# Supplementary material
Source: Springer Nature journal article supplement (https://www.springermedizin.de/resource/supplementary/12876_2014_1205_MOESM4_ESM.pdf/9438340)

Transferrin Saturation (TSAT)

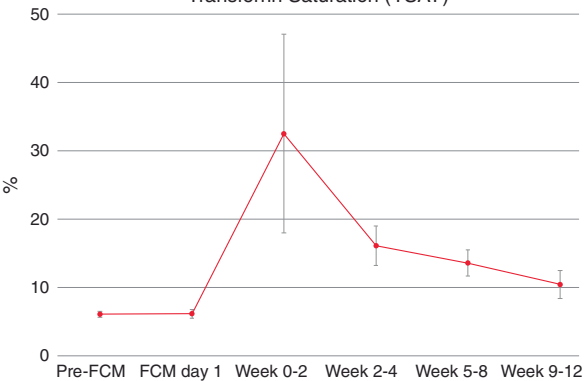

Ferritin

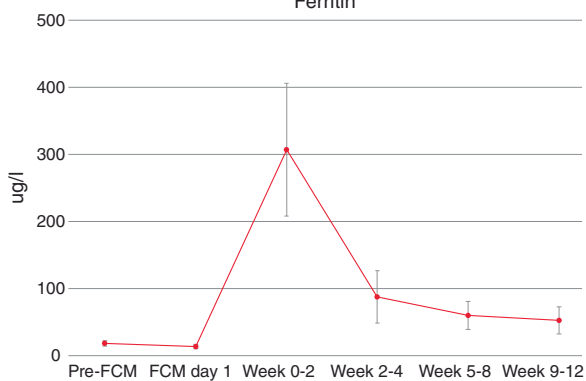

Soluble Transferrin Receptor (sTrRec)

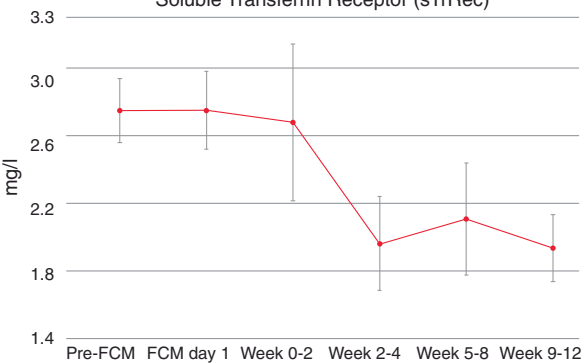

STrRec / Ferritin index

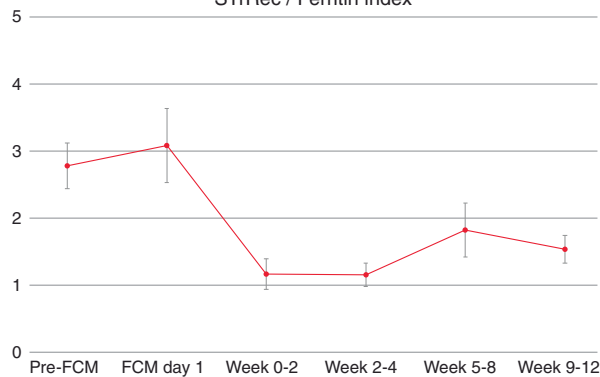

Supplement: MOESM4 [file 9438340]
